# Supplementary material
Source: Springer Nature journal article supplement (https://www.springermedizin.de/resource/supplementary/12885_2008_1204_MOESM6_ESM.pdf/9471400)

**A**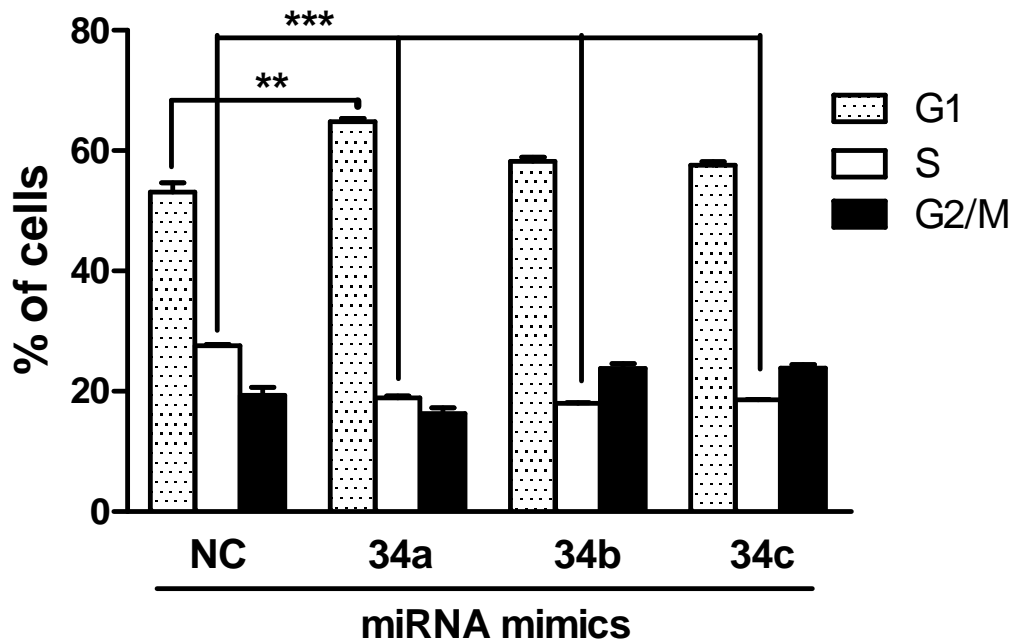**B**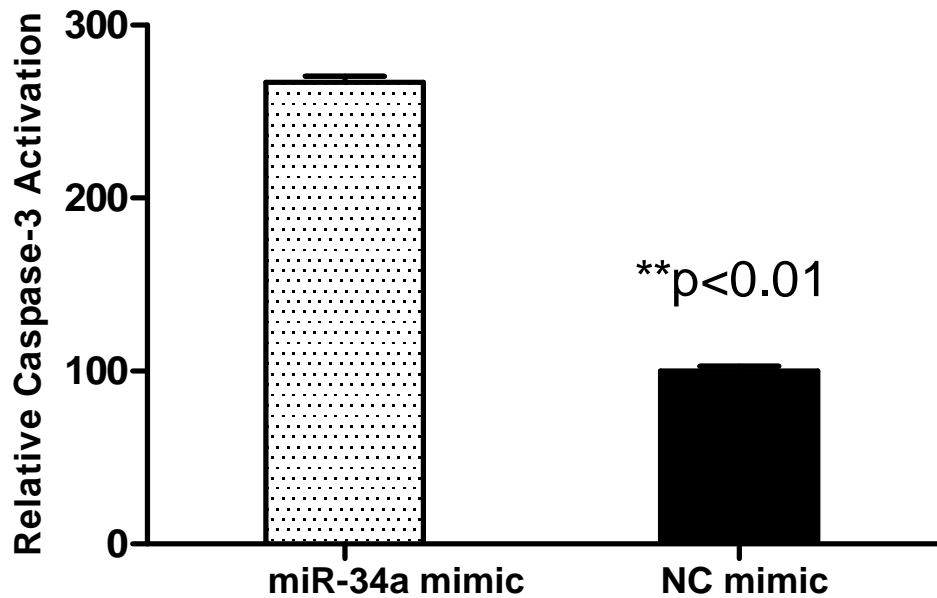

Supplement: MOESM6 [file 9471400]
